Studholme et al. Open Letter to the editor of *Phytopathology*

1 Transfer of *Xanthomonas campestris* pv. *arecae*, and *Xanthomonas campestris* pv. *musacearum* to  
2 *Xanthomonas vasicola* (Vauterin) as *Xanthomonas vasicola* pv. *arecae* comb. nov., and *Xanthomonas*  
3 *vasicola* pv. *musacearum* comb. nov. and description of *Xanthomonas vasicola* pv. *vasculorum* pv. nov.

## 4 **AUTHORS**

5 David J. Studholme, Emmanuel Wicker, Sadik Muzemil Abrare, Andrew Aspin, Adam Bogdanove, Kirk  
6 Broders, Zoe Dubrow, Murray Grant, Jeffrey B. Jones, Georgina Karamura, Jillian Lang, Jan Leach,  
7 George Mahuku, Gloria Valentine Nakato, Teresa Coutinho, Julian Smith, Carolee T. Bull

8

9 Corresponding author: David J. Studholme ([d.j.studholme@exeter.ac.uk](mailto:d.j.studholme@exeter.ac.uk))

10

## 11 **ABSTRACT**

12 Recent DNA sequence and other data indicated that several important bacterial pathogens should be  
13 transferred into the species *Xanthomonas vasicola* Vauterin 1995. The first objective of this letter is  
14 to propose the transfer of *X. campestris* pv. *musacearum* (Yirgou and Bradbury 1968) Dye 1978 to *X.*  
15 *vasicola* Vauterin 1995. The second objective is to give a clear overview of the different evolutionary  
16 lineages that constitute the species *X. vasicola*, in the light of recent genomics analyses. These analyses  
17 also indicate that strains described as [*X. campestris* pv. *zuae*] (Qhobela, Claflin, and Nowell 1990;  
18 Coutinho and Wallis 1991) fall within the species *X. vasicola* Vauterin 1995. Furthermore, the  
19 sequence of its *gyrB* gene suggested that *X. campestris* pv. *arecae* (Rao and Mohan 1970) Dye 1978 is  
20 closely related to the type strain of *X. vasicola*. Note that in this manuscript pathovar names that have  
21 no valid standing in nomenclature are presented with square brackets as is standard.

22

23 **AUTHOR ADDRESSES**

24

- 25 • David J. Studholme: Biosciences, University of Exeter, Exeter, United Kingdom
- 26 • Emmanuel Wicker: UMR IPME, Univ Montpellier, CIRAD, IRD, Montpellier, France
- 27 • Sadik Muzemiln Abrar: Southern Agricultural Research Institute (SARI), Areka Agricultural
- 28 Research Center, Areka, Ethiopia
- 29 • Andrew Aspin: Fera Science Ltd. York, UK
- 30 • Adam Bogdanove: Plant Pathology and Plant-Microbe Biology Section, School of Integrative
- 31 Plant Science, Cornell University, 334 Plant Science Building, Ithaca, NY 14853, USA
- 32 • Kirk Broders: Department of Bioagricultural Sciences and Pest Management, Colorado State
- 33 University
- 34 • Zoe Dubrow: Plant Pathology and Plant-Microbe Biology Section, School of Integrative Plant
- 35 Science, Cornell University, 334 Plant Science Building, Ithaca, NY 14853, USA
- 36 • Murray Grant: School of Life Sciences, Gibbet Hill, University of Warwick, Coventry, CV4 7AL,
- 37 UK
- 38 • Jeffrey B. Jones: University of Florida, Plant Pathology Dept. , 1453 Fifield Hall , Gainesville,
- 39 Florida, United States , 32611
- 40 • Georgina Karamura: Bioversity International, Uganda
- 41 • Jillian Lang: Department of Bioagricultural Sciences and Pest Management, Colorado State
- 42 University, Fort Collins, CO 80523
- 43 • Jan Leach: Bioagricultural Sciences and Pest Management, Colorado State University, Ft
- 44 Collins, CO 80523
- 45 • George Mahuku: International Institute of Tropical Agriculture (IITA), East Africa Hub, IITA-
- 46 Tanzania P.O. Box 34441, Dar es Salaam, Tanzania
- 47 • Gloria Valentine Nakato: International Institute of Tropical Agriculture (IITA), Plot 15B, Naguru
- 48 East Road, Upper Naguru, P.O. Box 7878, Kampala, Uganda
- 49 • Teresa Coutinho: Department of Microbiology and Plant Pathology, Centre for Microbial
- 50 Ecology and Genomics (CMEG), Forestry and Agricultural Biotechnology Institute (FABI),
- 51 University of Pretoria, Private Bag X28, Pretoria 0028, South Africa
- 52 • Julian Smith: Fera Science Ltd. York, UK
- 53 • Carolee T. Bull: Department of Plant Pathology and Environmental Microbiology, Penn State
- 54 University, University Park, Pennsylvania, USA

55

56 **LETTER TO THE EDITOR**

57 Members of the genus *Xanthomonas*, within the gamma-Proteobacteria, collectively cause disease on  
58 more than 400 plant species (Hayward 1993), though some members are apparently non-pathogenic  
59 (Vauterin et al. 1996) and some have been isolated from clinical samples such as skin microbiota (Seité,  
60 Zelenkova, and Martin 2017). Historically, taxonomy of *Xanthomonas* was tied to the plant host of  
61 isolation (Starr 1981; Wernham 1948), with the genus being split into large numbers of species, each  
62 defined by this single phenotypic feature (Dye 1962). Subsequently, most of the species were  
63 transferred (lumped) into a single species, *X. campestris*, and designated as nomenspecies because  
64 the organisms could not be distinguished from one another by phenotypic and physiological tests  
65 (Lapage et al. 1992; Dye and Lelliott 1974). As a temporary solution, and to help to maintain a  
66 connection with the historical and plant pathological literature, these nomenspecies were designated  
67 as pathovars within *X. campestris*, each defined by host range or disease syndrome (Dye et al. 1980).  
68 More recently, DNA sequence comparisons and biochemical approaches revealed that some of the  
69 host ranges of pathovars of *X. campestris* were not correlated with inferred phylogenies (Parkinson et  
70 al. 2007, 2009; Rodriguez-R et al. 2012). There have been heroic advances to improve the taxonomy  
71 of the genus as a whole (Vauterin et al. 1990; Vauterin, Rademaker, and Swings 2000; Rademaker et  
72 al. 2005; Vauterin et al. 1995) and individual taxa (da Gama et al. 2018; Constantin et al. 2016; Trébaol  
73 et al. 2000; Timilsina et al. 2019; Jones et al. 2004), based on phenotypic, chemotaxonomic and  
74 genotypic analyses, but in a number of taxa there remain issues not fully resolved.

75 The bacterial pathogen *X. campestris* pv. *musacearum* (Yirgou and Bradbury 1968) Dye 1978 presents  
76 a major threat to cultivation of banana and enset crops in central and eastern Africa, where it causes  
77 banana Xanthomonas wilt (BXW) and enset Xanthomonas wilt (EXW). Originally described as *X.*  
78 *musacearum* (Yirgou and Bradbury 1968), this pathogen was first isolated from enset and banana in  
79 Ethiopia in the 1960s and early 1970s, respectively (Yirgou and Bradbury 1968, 1974), although

Studholme et al. Open Letter to the editor of *Phytopathology*

80 symptoms consistent with EXW were reported for Ethiopia as early as the 1930s (Castellani 1939).  
81 However, only in the 21<sup>st</sup> century did the disease establish in the banana-growing areas of Burundi,  
82 Democratic Republic of Congo, Kenya, Rwanda, Tanzania and Uganda, (Biruma et al. 2007;  
83 Tushemereirwe et al. 2004; Ndungo et al. 2006; Reeder et al. 2007; Carter et al. 2010). In this region  
84 around the Great Lakes of eastern and central Africa, BXW disease severely challenges livelihoods and  
85 food security (Blomme et al. 2017; Shimwela et al. 2016; Tinzaara et al. 2016; Blomme et al. 2013;  
86 Biruma et al. 2007; Nakato, Mahuku, and Coutinho 2018).

87 There is confusion in the literature about the taxonomy of this bacterium. Since its assignment to *X.*  
88 *campestris* (Young et al. 1978), molecular sequence and biochemical data indicate that this pathogen  
89 is more closely related to *X. vasicola* (Parkinson et al. 2007; Aritua et al. 2007) as detailed below. Thus,  
90 the first objective of this letter is to propose the transfer of *X. campestris* pv. *musacearum* (Yirgou and  
91 Bradbury 1968) Dye 1978 to *X. vasicola* Vauterin 1995. The second objective is to give a clear overview  
92 of the different evolutionary lineages that constitute the species *X. vasicola*, in the light of recent  
93 genomics analyses. These analyses also indicate that strains described as [*X. campestris* pv. *zeae*]  
94 (Qhobela, Claflin, and Nowell 1990; Coutinho and Wallis 1991) fall within a clade of *X. campestris* pv.  
95 *vasculatorum* (Cobb 1894) Dye 1978 that belongs within the species *X. vasicola* Vauterin 1995.  
96 Furthermore, the sequence of its *gyrB* gene suggested that *X. campestris* pv. *arecae* (Rao and Mohan  
97 1970) Dye 1978 is closely related to the type strain of *X. vasicola* (Parkinson et al. 2009). Note that in  
98 this manuscript pathovar names that have no valid standing in nomenclature are presented with  
99 square brackets as is standard (Bull et al. 2012).

100 The species *X. vasicola* (Vauterin et al. 1995) was created to encompass *X. campestris* pv. *holcicola*  
101 (Elliott 1930) Dye 1978 and a subset of strains (not including the pathotype) of *X. campestris* pv.  
102 *vasculatorum* (Cobb 1894) Dye 1978 (Young et al. 1978; Vauterin et al. 1995). Taxonomic studies  
103 revealed that *X. campestris* pv. *vasculatorum* contained groups of strains that are clearly distinguishable

Studholme et al. Open Letter to the editor of *Phytopathology*

104 from the pathotype strain (of *X. campestris* pv. *vasculorum*) by phenotypic and molecular traits despite  
105 their shared host ranges (Vauterin et al. 1992; Péros et al. 1994; Dookun, Stead, and Autrey 2000;  
106 Stead 1989; Vauterin et al. 1995; Destéfano et al. 2003). Vauterin's type-B strains are distinguished  
107 from type-A strains (to which the pathotype strain of *X. campestris* pv. *vasculorum* belongs) by SDS-  
108 PAGE of proteins, gas chromatography of fatty acid methyl esters and DNA-DNA hybridization (Yang  
109 et al. 1993). Type-A and type-B strains can also be distinguished by PCR-RFLP analysis (Destéfano et  
110 al. 2003). Table 1 lists examples of *X. campestris* pv. *vasculorum* (Cobb 1894) Dye 1978 strains that  
111 were classified in one or more of those studies. Vauterin and colleagues assigned type-A strains, along  
112 with the pathotype, to *X. axonopodis* pv. *vasculorum* (Cobb) Vauterin, Hoste, Kersters & Swings and  
113 type-B to [*X. vasicola* pv. *vasculorum*] (Vauterin et al. 1995). However, we note that this pathovar is  
114 invalid because of the lack of a formal proposal differentiating it from other pathovars (Young et al.  
115 2004) and no designation of a pathotype strain. For a given organism, competing classifications and  
116 invalid names result in three different valid species names, *X. campestris*, *X. axonopodis* and *X.*  
117 *vasicola*, having been used in the literature. For example, various authors have referred to strain  
118 NCPPB 1326 as *X. campestris* pv. *vasculorum*, *X. axonopodis* pv. *vasculorum* (to which the strain clearly  
119 does not belong) or [*X. vasicola* pv. *vasculorum*] (Wasukira et al. 2014; Lewis Ivey, Tusiime, and Miller  
120 2010; Qhobela, Claflin, and Nowell 1990; Qhobela and Claflin 1992). Type-B strains NCPPB 702, NCPPB  
121 1326 and NCPPB 206 were erroneously described as *X. axonopodis* pv. *vasculorum* (Lewis Ivey,  
122 Tusiime, and Miller 2010) though they are clearly members of *X. vasicola*. However, we acknowledge  
123 that examples of mistakes such as these will not likely be resolved by transfer of the pathovars from  
124 *X. campestris* into *X. vasicola*.

125 A further source of confusion is the status of strains isolated from maize for which some authors use  
126 the invalid name [*X. campestris* pv. *zea*] (Qhobela, Claflin, and Nowell 1990; Coutinho and Wallis  
127 1991). Adding to the confusion, at least one strain of *X. campestris* pv. *vasculorum* (NCPPB 206)  
128 isolated from maize has the fatty-acid type characteristic of *X. vasicola* (Dookun, Stead, and Autrey

129 2000); consistent with this, on the basis of phylogenetic analysis of DNA sequence, NCPPB 206 falls  
130 among strains assigned to Vauterin's invalid [*X. vasicola* pv. *vasculatorum*] (Wasukira et al. 2014). A  
131 useful nomenclature for this group has become more pressing since the recent outbreak of leaf streak  
132 on corn in the USA, caused by bacteria very closely related to strains previously described as [*X.*  
133 *campestris* pv. *zeae*]. One of these strains, NCPPB 4614 (=SAM119), has been suggested to be the  
134 eventual pathotype strain of *X. vasicola* pv. *vasculatorum* though no valid proposal has been made (Lang  
135 et al. 2017; Korus et al. 2017). Although [*X. vasicola* pv. *vasculatorum*] (Vauterin et al. 1995) is invalid,  
136 this name has come to be understood by the community to represent a meaningful biological reality;  
137 that is a set of *X. campestris* pv. *vasculatorum* strains that are biochemically and phylogenetically similar  
138 to *X. vasicola*. Therefore, below we propose a formal description of *X. vasicola* pv. *vasculatorum* pv.  
139 nov. that should be considered valid to harmonize the formal nomenclature with that which is in use.  
140 Further, consistent with the previous suggestion (Lang et al. 2017) that strains classified to [*X. vasicola*  
141 pv. *vasculatorum*] and [*X. campestris* pv. *zeae*] (Vauterin et al. 1995) are insufficiently distinct to warrant  
142 separate pathovars, we therefore propose that [*X. vasicola* pv. *vasculatorum*] group B, [*X. campestris*  
143 pv. *zeae*] and phylogenetically closely related strains isolated from sugarcane and maize be assigned  
144 into the newly described *X. vasicola* pv. *vasculatorum* pv. nov.

145 Vauterin et al. (1995) designated the pathotype strain of *X. vasicola* pv. *holcicola* (LMG 736, NCPPB  
146 2417, ICMP 3103 and CFBP 2543) as the type strain of *X. vasicola*, although they did not use the  
147 pathovar epithet for the specific epithet of the species as is most appropriate to indicate this  
148 relationship. The natural host range of *X. vasicola* pv. *holcicola* includes the cereal crops millet and  
149 sorghum on which it causes bacterial leaf streak (Table 2). The host range of the strains that Vauterin  
150 et al. (1995) called [*X. vasicola* pv. *vasculatorum*] is less well defined because in most of the relevant  
151 pre-1995 literature it is impossible to distinguish between type-A and type-B of *X. campestris* pv.  
152 *vasculatorum* and therefore between *X. axonopodis* pv. *vasculatorum* and strains belonging to *X. vasicola*.  
153 However, *X. campestris* pv. *vasculatorum* type-B strains (that is, members of *X. vasicola*) have been

Studholme et al. Open Letter to the editor of *Phytopathology*

154 isolated from sugarcane and maize and shown to infect these hosts on artificial inoculation (Vauterin  
155 et al. 1995; Karamura et al. 2015).

156 Previous studies suggested a close relationship between *X. campestris* pv. *musacearum* (Yirgou and  
157 Bradbury 1968) Dye 1978b and *X. vasicola* pv. *holcicola* (Elliott 1930) Vauterin et al. 1995 based on  
158 fatty acid methyl ester analysis, genomic fingerprinting using rep-PCR and partial nucleotide  
159 sequencing of the *gyrB* gene (Aritua et al. 2007; Parkinson et al. 2009). Draft or complete sequence  
160 assemblies are now available for more than a thousand *Xanthomonas* genomes, including those of  
161 type strains for most species and pathotypes for most pathovars. Genome-wide sequence data can  
162 offer some advantages, such as generally applicable threshold values for species delineation (Glaeser  
163 and Kämpfer 2015; Meier-Kolthoff et al. 2013; Meier-Kolthoff, Klenk, and Göker 2014; Richter and  
164 Rosselló-Móra 2009). Therefore, we further explored relationships among these organisms using  
165 whole genome sequences. We calculated pairwise average nucleotide identity (ANI) between *X.*  
166 *campestris* pv. *musacearum* and representative *Xanthomonas* strains, including all available species  
167 type strains and relevant pathotype strains. A representative subset of these pairwise ANI percentages  
168 is tabulated in Figure 1. This revealed that the pathotype strain of *X. campestris* pv. *musacearum*  
169 (Yirgou and Bradbury 1968) Dye 1978b shares 98.43 % ANI with the type strain of *X. vasicola* but only  
170 87.27 % with the type strain of *X. campestris*. As expected, strains of *X. vasicola* pv. *holcicola* share  
171 high ANI (> 99.6 %) with the *X. vasicola* type strain NCPPB 2417, which is also the pathotype strain of  
172 *X. vasicola* pv. *holcicola* (Elliott 1930) Vauterin et al. 1995. Also as expected, strains of *X. campestris*  
173 pv. *vasculorum* previously called [*X. vasicola* pv. *vasculorum*] or [*X. campestris* pv. *zuae*], including  
174 sequenced strain SAM119 (=NCPBP 4614) from corn isolated by T. Coutinho (Qhobela, Claffin, and  
175 Nowell 1990), share > 98.5 % ANI with the type strain of *X. vasicola*, supporting the need to transfer  
176 these strains to this species. Furthermore, unclassified strains NCPPB 902, NCPPB 1394, NCPPB 1395  
177 and NCPPB 1396, from *Tripsacum laxum* (Mulder 1961) and the pathotype strain of *X. campestris* pv.  
178 *arecae* (Rao and Mohan 1970) Dye 1978 (NCPBP 2649) all share more than 98 % ANI with the type

Studholme et al. Open Letter to the editor of *Phytopathology*

179 strain of *X. vasicola*, which places them unambiguously within *X. vasicola*. The next-nearest species to  
180 *X. vasicola* is *X. oryzae*; ANI between the respective type strains of these two species is 91.7%. It has  
181 been proposed that the boundary of a prokaryotic species can be delimited by 95 to 96% (Richter and  
182 Rosselló-Móra 2009). By this criterion, *X. campestris* pv. *arecae*, *X. campestris* pv. *musacearum* and  
183 strains from corn that are referred to by the invalid name [*Xanthomonas vasicola* pv. *zear*] clearly fall  
184 within *X. vasicola* and outside *X. campestris*.

185 The high ANI levels clearly delineate a genom-species that includes the type strain *X. vasicola* NCPPB  
186 2417. Nevertheless, despite the usefulness of ANI for delimiting species boundaries, it does not  
187 include any model of molecular evolution and thus is unsuited for phylogenetic reconstruction.  
188 Therefore, we used RaxML via the RealPhy pipeline (Bertels et al. 2014; Stamatakis, Ludwig, and Meier  
189 2005) to elucidate phylogenetic relationships, based on genome-wide sequencing data. This approach  
190 has the additional advantage of being based on sequence reads rather than on genome assemblies,  
191 where the latter may be of variable quality and completeness (Bertels et al. 2014).

192 Figure 2 depicts the phylogeny of *X. vasicola* based on RealPhy analysis of genome-wide sequence  
193 data. Pathovars *X. vasicola* pv. *holcicola* and *X. campestris* pv. *musacearum* are monophyletic,  
194 comprising well supported clades within the *X. vasicola* genom-species. A third well supported clade  
195 includes the four "*Xanthomonas* sp." strains originating from *Tripsacum laxum*. A fourth clade consists  
196 of mostly *X. campestris* pv. *vasculorum* strains isolated from sugarcane but also includes *X. campestris*  
197 pv. *vasculorum* strain NCPPB 206 isolated from maize and several strains from maize attributed to the  
198 invalid name [*X. campestris* pv. *zear*]. This indicates that sequenced strains of [*X. campestris* pv. *zear*]  
199 from corn (Sanko et al. 2018; Lang et al. 2017; Qhobela, Clafin, and Nowell 1990; Coutinho and Wallis  
200 1991) are monophyletic and fall within the clade containing type-B strains of *X. campestris* pv.  
201 *vasculorum* (Figure 2). The single sequenced pathotype strain of *X. campestris* pv. *arecae* falls



202 immediately adjacent to the *X. vasicola* clade containing strains from corn and *X. campestris* pv.  
203 *vasculorum* type B strains (Figure 2).

204 Overall, our molecular sequence analyses strongly point to the existence of a phylogenetically  
205 coherent species *X. vasicola* that includes strains previously assigned to *X. campestris* pathovars  
206 *musacearum*, *arecae*, and some strains of *X. campestris* pv. *vasculorum* and strains collected from corn  
207 and *T. laxum* grass that have not been previously assigned to species nor pathovar. Here we propose  
208 that the pathovar *Xanthomonas vasicola* pv. *vasculorum* pv. nov. includes strains formerly classified  
209 as *X. campestris* pv. *vasculorum* but distinguishable from *X. axonopodis* pv. *vasculorum* (Cobb)  
210 Vauterin, Hoste, Kersters & Swings by protein SDS-PAGE, fatty acid methyl esterase (FAME) analysis  
211 and DNA hybridisation (Vauterin et al. 1992; Yang et al. 1993; Vauterin et al. 1995). Our analyses also  
212 support the transfer of *X. campestris* pv. *arecae* (Rao and Mohan 1970) Dye 1978 to *X. vasicola*.  
213 Although only a single genome of this pathovar has been sequenced, that genome belongs to the  
214 pathotype strain for this pathovar (Rao and Mohan 1970; C.T. Bull et al. 2010).

215 Our results are consistent with previous evidence for similarity between *X. campestris* pv.  
216 *musacearum* (Yirgou and Bradbury 1968) Dye 1978 and strains of *X. vasicola*, based on FAME, genomic  
217 fingerprinting with rep-PCR and *gyrB* sequencing (Aritua et al. 2007; Parkinson et al. 2007). The formal  
218 species description for *X. vasicola* states that this species can be clearly distinguished by its FAME  
219 profiles (Vauterin et al. 1995). Pathogenicity studies demonstrated phenotypic distinctiveness of *X.*  
220 *campestris* pv. *musacearum* (Yirgou and Bradbury 1968) Dye 1978 on banana; *X. campestris* pv.  
221 *musacearum* produces severe disease whereas *X. vasicola* pv. *holcicola* NCPPB 2417 and *X. campestris*  
222 pv. *vasculorum* NCPPB 702 (which belongs to *X. vasicola*) showed no symptoms (Aritua et al. 2007).  
223 The species description (Vauterin et al. 1995) also states that *X. vasicola* is characterised by metabolic  
224 activity on the carbon substrates D-psicose and L-glutamic acid, and by a lack of metabolic activity on  
225 the carbon substrates N-acetyl-D-galactosamine, L-arabinose, α-D-lactose, D-melibiose, P-methyl-D-

Studholme et al. Open Letter to the editor of *Phytopathology*

226 glucoside, L-rhamnose, D-sorbitol, formic acid, D-galactonic acid lactone, D-galacturonic acid, D-  
227 gluconic acid, D-glucuronic acid, p-hydroxyphenylacetic acid, α-ketovaleric acid, quinic acid,  
228 glucuronamide, L-asparagine, L-histidine, L-phenylalanine, urocanic acid, inosine, uridine, thymidine,  
229 DL-α-glycerol phosphate, glucose 1-phosphate, and glucose 6-phosphate. We are not aware that these  
230 metabolic activities have been tested for *X. campestris* pv. *arecae*, *X. campestris* pv. *musacearum* and  
231 strains referred to as [*X. campestris* pv. *zeae*]; it is possible that the species description may need to  
232 be amended to accommodate any deviation from this definition among the repositioned pathovars.

233 Overall, it seems that the species *X. vasicola* (including *X. vasicola* pv. *holcicola*, *X. campestris* pv.  
234 *vasculorum* type-B strains, [*X. campestris* pv. *zeae*] strains, *X. campestris* pv. *arecae* and some strains  
235 isolated from *T. laxum*) is almost exclusively associated with monocot plants of the families Palmae  
236 and Gramineae. In this respect, it is similar to its closest sibling species *X. oryzae*, whose host range is  
237 limited to Gramineae (Bradbury 1986). The exception is a report of leaf blight and dieback in  
238 *Eucalyptus* caused by *X. vasicola* (Coutinho et al. 2015), remarkable given the phylogenetic distance  
239 between this dicot plant and the usual monocot hosts of *X. vasicola*; the infected South African  
240 plantation was in an area where sugarcane is grown.

241 In conclusion, analysis of available genome sequence data, combined with published pathogenicity  
242 and biochemical data, strongly support the transfer of *X. campestris* pathovars *arecae* and  
243 *musacearum* to the species *X. vasicola* as *X. vasicola* pv. *musacearum* comb. nov. with NCPPB 2005 as  
244 the pathotype strain (being the type strain of *X. musacearum* and pathotype strain of *X. campestris*  
245 pv. *musacearum*) and *X. vasicola* pv. *arecae* comb. nov. with NCPPB 2649 as the pathotype strain (being  
246 the type strain of *X. arecae* and pathotype strain of *X. campestris* pv. *arecae*). Strains NCPPB 206,  
247 NCPPB 702, NCPPB 795, NCPPB 890, NCPPB 895, NCPPB 1326, NCPPB 1381, and NCPPB 4614 form a  
248 phylogenetically and phenotypically coherent group with a distinctive host range causing symptoms  
249 on maize and sugarcane but not on banana (Aritua et al. 2007; Karamura et al. 2015). We designate

Studholme et al. Open Letter to the editor of *Phytopathology*

250 the pathotype strain for *X. vasicola* pv. *vasculorum* pv. nov. as NCPPB 4614. This strain was previously  
251 proposed as the pathotype of *X. vasicola* pv. *vasculorum* (Lang et al. 2017) and causes disease  
252 symptoms on maize and sugarcane (Lang et al. 2017) but not on banana (unpublished observation, Z.  
253 Dubrow and A. Bogdanove). Furthermore, given that strains from corn formerly described by the  
254 invalid name [*X. campestris* pv. *zeae*] are members of *X. vasicola* and have host ranges that can not be  
255 distinguished from the pathotype strain of *X. vasicola* pv. *vasculorum*, we propose that these strains  
256 are members of this pathovar. Phylogenetic data support this as the corn strains represent a sub-clade  
257 within strains of *X. campestris* pv. *vasculorum* that fall within the emended *X. vasicola*.

258 **EMENDED DESCRIPTION OF *XANTHOMONAS VASICOLA* VAUTERIN ET.**  
259 **AL., 1995.**

260 The characteristics are as described for the genus and the species (Vauterin et al., 1995) extended  
261 with phylogenetic data from this study. The species can be clearly distinguished from other  
262 xanthomonads by MLSA and whole genome sequence analysis with members having more than 98 %  
263 ANI with the type strain. SDS-PAGE protein and FAME profiles have been shown to be distinguishing  
264 for some pathovars (Yang et al. 1993; Vauterin et al. 1992; Aritua et al. 2007), by the presence of  
265 metabolic activity on the carbon substrates D-psicose and L-glutamic acid, and by a lack of metabolic  
266 activity on the carbon substrates N-acetyl-D-galactosamine, L-arabinose, α-D-lactose, D-melibiose, P-  
267 methyl-D- glucoside, L-rhamnose, D-sorbitol, formic add, D-galactonic acid lactone, D-galacturonic  
268 acid, D-gluconic acid, D-glucuronic acid, p-hydroxyphenylacetic acid, α-ketovaleric acid, quinic acid,  
269 glucuronamide, L-asparagine, L-histidine, L-phenylalanine, urocanic acid, inosine, uridine, thymidine,  
270 DL-α-glycerol phosphate, glucose 1-phosphate, and glucose 6-phosphate. The G+C content is between  
271 63.1 and 63.6 mol % as calculated from whole-genome sequence data. The type strain is *X. vasicola*  
272 pv. *holcicola* LMG 736 (= NCPPB 2417 = ICMP 3103 = CFBP 2543).

273 ***X. vasicola* pv. *holcicola* Vauterin et al., 1995.**

274 = *X. campestris* pv. *holcicola* (Elliott) Dye 1978.

275 Description is as presented by Vauterin et al., (1995). The pathovar is distinguished on the  
276 basis of phytopathogenic specialization. As shown here and elsewhere (Lang et al. 2017), the  
277 pathovar is distinct from other pathovars by MLSA and genome-wide sequence analysis.  
278 According to Bradbury (1986), gelatin and starch are hydrolysed by most isolates examined.  
279 The natural host range includes: *Panicum miliaceum*, *Sorghum* spp., *S. alnum*, *S. bicolor* (*S.*

280 *vulgare*), *S. caffrorum*, *S. durra*, *S. halepense*, *S. sudanense*, *S. technicum* (*S. bicolor* var.  
281 *technicus*), *Zea mays*. The artificial host range (by inoculation) includes *Echinochloa*  
282 *frumentacea*, *Pennisetum typhoides*, *Setaria italica*.

283 Pathotype strain: PDDCC 3103; NCPPB 2417.

284 ***X. vasicola* pv. *vasculorum* pv. nov.**

285 Description as for the species and this pathovar is distinguished on the basis of  
286 phytopathogenic specialization and includes the strains of the former taxon *X. campestris* pv.  
287 *vasculorum* type B and pathogens from corn. The pathovar is identified to species and  
288 distinguished from other pathovars by its *gyrB* gene sequence (Parkinson et al. 2009) and  
289 genome-wide sequence analysis. It is not known whether the strains being transferred to this  
290 taxon conform to the species description for metabolic activity. According to previously  
291 published work (Coutinho et al. 2015; Aritua et al. 2007; Karamura et al. 2015; Hayward  
292 1962)(unpublished observation, S. Dubrow and A. Bogdanove) the natural host range  
293 includes: *Saccharum* spp., *Zea mays*, *Eucalyptus grandis*.

294 Pathotype strain: NCPPB 4614; SAM119.

295 ***X. vasicola* pv. *arecae* (Rao & Mohan) Dye 1978 comb. nov.**

296 = *X. campestris* pv. *arecae* (Rao & Mohan) Dye 1978.

297 Description as for the species and this pathovar is distinguished on the basis of  
298 phytopathogenic specialization. The pathovar is identified to species and distinguished from  
299 other pathovars by its *gyrB* gene sequence (Parkinson et al. 2009) and by genome-wide  
300 sequence analysis. According to Bradbury (1980) the natural host range includes: *Areca*  
301 *catechu* (areca nut). Bradbury (1986) reports the artificial host range to include: *Cocos nucifera*  
302 (coconut). Needle prick into sugar cane produced limited streaks, but the bacteria did multiply  
303 to some extent and could be re-isolated. Disease: leaf stripe. Long, narrow water-soaked  
304 lesions, becoming dark brown or black with age. It is not known if the strains being transferred  
305 to this taxon conform to the species description for metabolic activity.

306 Pathotype strain: NCPPB 2649; PDDCC 5791.

307 ***X. vasicola* pv. *musacearum* (Yirgou & Bradbury) Dye 1978 comb. nov.**

308 = *X. campestris* pv. *musacearum* (Yirgou & Bradbury) Dye 1978.

309 Description as for the species and this pathovar is identified to species and distinguished on  
310 the basis of phytopathogenic specialization and is distinct from other pathovars by its *gyrB*  
311 gene sequence (Parkinson et al. 2009) and genome-wide sequence analysis. Gelatin slowly  
312 liquefied, starch not hydrolysed. Growth quite rapid and very mucoid. According to Bradbury

Studholme et al. Open Letter to the editor of *Phytopathology*

313 (1986), the natural hosts include: *Ensete ventricosum* (enset), *Musa* spp. (banana). Additional  
314 hosts by inoculation: *Saccharum* sp. (sugarcane), *Zea mays* (maize) and disease is exhibited as  
315 a bacterial wilt where leaves wilt and wither; yellowish bacterial masses are found in vascular  
316 tissue and parenchyma. It is not known if the strains being transferred to this taxon conform  
317 to the species description for metabolic activity.  
318 Pathotype strain: NCPPB 2005; PDDCC 2870.

319

320

321

322 **REFERENCES**

323

324 Aritua, V., Parkinson, N., Thwaites, R., Heeney, J. V, Jones, D. R., Tushemereirwe, W., et al. 2007.

325 Characterization of the *Xanthomonas* sp. causing wilt of enset and banana and its proposed

326 reclassification as a strain of *X. vasicola*. *Plant Pathol.* 57:170–177.

327 Bertels, F., Silander, O. K., Pachkov, M., Rainey, P. B., and van Nimwegen, E. 2014. Automated

328 reconstruction of whole-genome phylogenies from short-sequence reads. *Mol. Biol. Evol.* 31:1077–

329 88.

330 Biruma, M., Pillay, M., Tripathi, L., Blomme, G., Abele, S., Mwangi, M., et al. 2007. Banana

331 *Xanthomonas* wilt: A review of the disease, management strategies and future research directions.

332 *African J. Biotechnol.* 6:953–962.

333 Blomme, G., Dita, M., Jacobsen, K., Pérez-Vicente, L., Molina, A., Ocimati, W., et al. 2017. Bacterial

334 diseases of bananas and enset: current state of knowledge and integrated approaches towards

335 sustainable management. *Front. Plant Sci.* 8:1290.

336 Blomme, G., Ploetz, R., Jones, D., De Langhe, E., Price, N., Gold, C., et al. 2013. A historical overview of

337 the appearance and spread of *Musa* pests and pathogens on the African continent: highlighting the

338 importance of clean *Musa* planting materials and quarantine measures. *Ann. Appl. Biol.* 162:4–26.

339 Bradbury, J. F. 1986. *Guide to plant pathogenic bacteria*. CAB International.

340 Bull, C. T., De Boer, S. H., Denny, T. P., Firrao, G., Fischer-Le Saux, M., Saddler, G. S., et al. 2012. List of

341 new names of plant pathogenic bacteria (2008-2010). *J. Plant Pathol.* 94:21–27.

342 C.T. Bull, 1, S.H. De Boer, 2, T.P. Denny, 3, et al. 2010. Comprehensive list of names of plant pathogenic

343 bacteria, 1980-2007. *J. Plant Pathol.* 92:551–592.

Studholme et al. Open Letter to the editor of *Phytopathology*

- 344 Carter, B. A., Reeder, R., Mgenzi, S. R., Kinyua, Z. M., Mbaka, J. N., Doyle, K., et al. 2010. Identification  
345 of *Xanthomonas vasicola* (formerly *X. campestris* pv. *musacearum*), causative organism of banana  
346 xanthomonas wilt, in Tanzania, Kenya and Burundi. *Plant Pathol.* 59:403.
- 347 Castellani, E. 1939. Su un marciume dell'*Ensete*. *L'Agricoltura Colon.* 33:297–300.
- 348 Cobb, N. A. 1894. Plant diseases and their remedies. Diseases of the sugarcane. *Agric. Gaz. N. S. W.*  
349 4:808–833.
- 350 Constantin, E. C., Cleenwerck, I., Maes, M., Baeyen, S., Van Malderghem, C., De Vos, P., et al. 2016.  
351 Genetic characterization of strains named as *Xanthomonas axonopodis* pv. *dieffenbachiae* leads to a  
352 taxonomic revision of the *X. axonopodis* species complex. *Plant Pathol.* 65:792–806.
- 353 Coutinho, T. A., and Wallis, F. M. 1991. Bacterial Streak Disease of Maize (*Zea mays* L.) in South Africa.  
354 *J. Phytopathol.* 133:112–112.
- 355 Coutinho, T. A., van der Westhuizen, L., Roux, J., Mcfarlane, S. A., and Venter, S. N. 2015. Significant  
356 host jump of *Xanthomonas vasicola* from sugarcane to a *Eucalyptus grandis* clone in South Africa.  
357 *Plant Pathol.* 64:576–581.
- 358 Destéfano, S. A. L., Almeida, I. M. G., Rodrigues Neto, J., Ferreira, M., and Balani, D. M. 2003.  
359 Differentiation of *Xanthomonas* species pathogenic to sugarcane by PCR-RFLP analysis. *Eur. J. Plant*  
360 *Pathol.* 109:283–288.
- 361 Dookun, A., Stead, D. E., and Autrey, L. J. 2000. Variation among strains of *Xanthomonas campestris*  
362 pv. *vasculorum* from Mauritius and other countries based on fatty acid analysis. *Syst. Appl. Microbiol.*  
363 23:148–55.
- 364 Dye, D., and Lelliott, R. 1974. Genus II. *Xanthomonas* Dowson 1939. In *Bergey's Manual of*  
365 *Determinative Bacteriology*, eds. R. E. Buchanan and N. E. Gibbons. Williams and Wilkins Co.,  
366 Baltimore, U.S.A., p. 243–249.

Studholme et al. Open Letter to the editor of *Phytopathology*

- 367 Dye, D. W. 1962. The inadequacy of the usual determinative tests for the identification of  
368 *Xanthomonas* spp. New Zeal. J. Sci. 5:393–416.
- 369 Dye, D. W., Bradbury, J. F., Goto, M., Hayward, A. C., Lelliott, R. A., and Schroth, M. N. 1980.  
370 International standards for naming pathovars of phytopathogenic bacteria and a list of pathovar  
371 names and pathotype strains. Rev. Plant Pathol. 59:153–168.
- 372 Elliott, C. 1930. Bacterial streak disease of Sorghums. J. Agric. Res. 40:963–976 pp.
- 373 da Gama, M. A. S., Mariano, R. de L. R., da Silva Júnior, W. J., de Farias, A. R. G., Barbosa, M. A. G.,  
374 Ferreira, M. Á. da S. V., et al. 2018. Taxonomic Repositioning of *Xanthomonas campestris* pv. *viticola*  
375 (Nayudu 1972) Dye 1978 as *Xanthomonas citri* pv. *viticola* (Nayudu 1972) Dye 1978 comb. nov. and  
376 Emendation of the Description of *Xanthomonas citri* pv. *anac*. Phytopathology. 108:1143–1153.
- 377 Glaeser, S. P., and Kämpfer, P. 2015. Multilocus sequence analysis (MLSA) in prokaryotic taxonomy.  
378 Syst. Appl. Microbiol. 38:237–45.
- 379 Harrison, J., and Studholme, D. J. 2014. Draft genome sequence of *Xanthomonas axonopodis* pathovar  
380 *vasculorum* NCPPB 900. FEMS Microbiol. Lett. 360:113–6.
- 381 Hayward, A. C. 1962. *Studies on Bacterial Pathogens of Sugar Cane*. Mauritius Sugar Industry Research  
382 Institute.
- 383 Hayward, A. C. 1993. The hosts of *Xanthomonas*. In *Xanthomonas*, eds. J G Swings and E L Civerolo.  
384 Dordrecht: Springer Netherlands, p. 1–119.
- 385 Jacques, M. A., Bolot, S., Charbit, E., Darrasse, A., Briand, M., Arlat, M., et al. 2013. High-quality draft  
386 genome sequence of *Xanthomonas alfalfae* subsp. *alfalfae* strain CFBP 3836. Genome Announc.  
387 1:e01035-13-e01035-13.
- 388 Jones, J. B., Lacy, G. H., Bouzar, H., Stall, R. E., and Schaad, N. W. 2004. Reclassification of the



Studholme et al. Open Letter to the editor of *Phytopathology*

- 389 Xanthomonads Associated with Bacterial Spot Disease of Tomato and Pepper. Syst. Appl. Microbiol.  
390 27:755–762.
- 391 Karamura, G., Smith, J., Studholme, D., Kubiriba, J., and Karamura, E. 2015. Comparative pathogenicity  
392 studies of the *Xanthomonas vasicola* species on maize, sugarcane and banana. African J. Plant Sci.  
393 9:385–400.
- 394 Korus, K., Lang, J. M., Adesemoye, A. O., Block, C. C., Pal, N., Leach, J. E., et al. 2017. First Report of  
395 *Xanthomonas vasicola* causing bacterial leaf streak on corn in the United States. Plant Dis. 101:1030.
- 396 Kumar, S. N. S. 1983. Epidemiology of bacterial leaf stripe disease of arecanut palm. Trop. Pest Manag.  
397 29:249–252.
- 398 Kumar, S. N. S. 1993. Perpetuation and host range of *Xanthomonas campestris* pv. *arecae* incitant of  
399 bacterial leaf stripe disease of arecanut palm. Adv. Hortic. For. 3:99–103.
- 400 Lang, J. M., DuCharme, E., Ibarra Caballero, J., Luna, E., Hartman, T., Ortiz-Castro, M., et al. 2017.  
401 Detection and characterization of *Xanthomonas vasicola* pv. *vasculorum* (Cobb 1894) comb. nov.  
402 causing bacterial leaf streak of corn in the United States. Phytopathology. 107:1312–1321.
- 403 Lapage, S. P., Sneath, P. H. A., Lessel, E. F., Skerman, V. B. D., Seeliger, H. P. R., and Clark, W. A., eds.  
404 1992. *International Code of Nomenclature of Bacteria: Bacteriological Code, 1990 Revision*.  
405 Washington (DC).
- 406 Leinonen, R., Sugawara, H., and Shumway, M. 2011. The Sequence Read Archive. Nucleic Acids Res.  
407 39:D19–D21.
- 408 Lewis Ivey, M. L., Tusiime, G., and Miller, S. A. 2010. A polymerase chain reaction assay for the  
409 detection of *Xanthomonas campestris* pv. *musacearum* in banana. Plant Dis. 94:109–114.
- 410 Marçais, G., Delcher, A. L., Phillippy, A. M., Coston, R., Salzberg, S. L., and Zimin, A. 2018. MUMmer4:

Studholme et al. Open Letter to the editor of *Phytopathology*

- 411 A fast and versatile genome alignment system ed. Aaron E. Darling. PLOS Comput. Biol. 14:e1005944.
- 412 Meier-Kolthoff, J. P., Auch, A. F., Klenk, H.-P., and Göker, M. 2013. Genome sequence-based species  
413 delimitation with confidence intervals and improved distance functions. BMC Bioinformatics. 14:60.
- 414 Meier-Kolthoff, J. P., Klenk, H.-P., and Göker, M. 2014. Taxonomic use of DNA G+C content and DNA-  
415 DNA hybridization in the genomic age. Int. J. Syst. Evol. Microbiol. 64:352–6.
- 416 Mulder, D. 1961. A Bacterial Disease of Guatemala Grass. Tea Q. 32:143–144.
- 417 Nakato, V., Mahuku, G., and Coutinho, T. 2018. *Xanthomonas campestris* pv. *musacearum*: a major  
418 constraint to banana, plantain and enset production in central and east Africa over the past decade.  
419 Mol. Plant Pathol. 19:525–536.
- 420 Ndungo, V., Eden-Green, S., Blomme, G., Crozier, J., and Smith, J. J. 2006. Presence of banana  
421 xanthomonas wilt (*Xanthomonas campestris* pv. *musacearum*) in the Democratic Republic of Congo  
422 (DRC). Plant Pathol. 55:294.
- 423 Parkinson, N., Aritua, V., Heeney, J., Cowie, C., Bew, J., and Stead, D. 2007. Phylogenetic analysis of  
424 *Xanthomonas* species by comparison of partial gyrase B gene sequences. Int. J. Syst. Evol. Microbiol.  
425 57:2881–7.
- 426 Parkinson, N., Cowie, C., Heeney, J., and Stead, D. 2009. Phylogenetic structure of *Xanthomonas*  
427 determined by comparison of *gyrB* sequences. Int. J. Syst. Evol. Microbiol. 59:264–74.
- 428 Péros, J. P., Girard, J. C., Lombard, H., Janse, J. D., and Berthier, Y. 1994. Variability of *Xanthomonas*  
429 *campestris* pv. *vasculorum* from sugarcane and other Gramineae in Reunion Island. Characterization  
430 of a different xanthomonad. J. Phytopathol. 142:177–188.
- 431 Potnis, N., Krasileva, K., Chow, V., Almeida, N. F., Patil, P. B., Ryan, R. P., et al. 2011. Comparative  
432 genomics reveals diversity among xanthomonads infecting tomato and pepper. BMC Genomics.

Studholme et al. Open Letter to the editor of *Phytopathology*

433 12:146.

434 Qhobela, M., and Claflin, L. E. 1992. Eastern and southern African strains of *Xanthomonas campestris*  
435 pv. *vasculorum* are distinguishable by restriction fragment length polymorphism of DNA and  
436 polyacrylamide gel electrophoresis of membrane proteins. *Plant Pathol.* 41:113–121.

437 Qhobela, M., Claflin, L. E., and Nowell, D. C. 1990. Evidence that *Xanthomonas campestris* pv. *zeae* can  
438 be distinguished from other pathovars capable of infecting maize by restriction fragment length  
439 polymorphism of genomic DNA. *Can. J. Plant Pathol.* 12:183–186.

440 Rademaker, J. L. W., Louws, F. J., Schultz, M. H., Rossbach, U., Vauterin, L., Swings, J., et al. 2005. A  
441 comprehensive species to strain taxonomic framework for *Xanthomonas*. *Phytopathology.* 95:1098–  
442 111.

443 Rao, Y. P., and Mohan, S. K. 1970. A new bacterial leaf stripe disease of arecanut (*Areca catechu*) in  
444 Mysore State. *Indian Phytopathol.* 23:702–704.

445 Reeder, R. H., Muhinyuza, J. B., Opolot, O., Aritua, V., Crozier, J., and Smith, J. 2007. Presence of banana  
446 bacterial wilt (*Xanthomonas campestris* pv. *musacearum*) in Rwanda. *Plant Pathol.* 56:1038.

447 Richter, M., and Rosselló-Móra, R. 2009. Shifting the genomic gold standard for the prokaryotic species  
448 definition. *Proc. Natl. Acad. Sci. U. S. A.* 106:19126–31.

449 Rodriguez-R, L. M., Grajales, A., Arrieta-Ortiz, M., Salazar, C., Restrepo, S., and Bernal, A. 2012.  
450 Genomes-based phylogeny of the genus *Xanthomonas*. *BMC Microbiol.* 12:43.

451 Sanko, T. J., Kraemer, A. S., Niemann, N., Gupta, A. K., Flett, B. C., Mienie, C., et al. 2018. Draft genome  
452 assemblages of 10 *Xanthomonas vasicola* pv. *zeae* strains, pathogens causing leaf streak disease of  
453 maize in South Africa. *Genome Announc.* 6:1–2.

454 Seité, S., Zelenkova, H., and Martin, R. 2017. Clinical efficacy of emollients in atopic dermatitis patients

Studholme et al. Open Letter to the editor of *Phytopathology*

- 455 - relationship with the skin microbiota modification. *Clin. Cosmet. Investig. Dermatol.* 10:25–33.
- 456 Shimwela, M. M., Ploetz, R. C., Beed, F. D., Jones, J. B., Blackburn, J. K., Mkulila, S. I., et al. 2016. Banana  
457 xanthomonas wilt continues to spread in Tanzania despite an intensive symptomatic plant removal  
458 campaign: an impending socio-economic and ecological disaster. *Food Secur.* 8:939–951.
- 459 da Silva, A. C. R., Ferro, J. A., Reinach, F. C., Farah, C. S., Furlan, L. R., Quaggio, R. B., et al. 2002.  
460 Comparison of the genomes of two *Xanthomonas* pathogens with differing host specificities. *Nature.*  
461 417:459–63.
- 462 Stamatakis, A., Ludwig, T., and Meier, H. 2005. RAxML-III: a fast program for maximum likelihood-  
463 based inference of large phylogenetic trees. *Bioinformatics.* 21:456–63.
- 464 Starr, M. P. 1981. The genus *Xanthomonas*. In *The Prokaryotes*, eds. Mortimer P. Starr, Heinz Stolp,  
465 Hans G. Trüper, Albert Balows, and Hans G. Schlegel. Berlin, Heidelberg: Springer Berlin Heidelberg, p.  
466 742–763.
- 467 Stead, D. E. 1989. Grouping of *Xanthomonas campestris* pathovars of cereals and grasses by fatty acid  
468 profiling. *EPPO Bull.* 19:57–68.
- 469 Studholme, D. J., Kemen, E., MacLean, D., Schornack, S., Aritua, V., Thwaites, R., et al. 2010. Genome-  
470 wide sequencing data reveals virulence factors implicated in banana *Xanthomonas* wilt. *FEMS*  
471 *Microbiol. Lett.* 310:182–192.
- 472 Timilsina, S., Kara, S., Jacques, M. A., Potnis, N., Minsavage, G. V., Vallad, G. E., et al. 2019.  
473 Reclassification of *Xanthomonas gardneri* (ex Šutič 1957) Jones et al. 2006 as a later heterotypic  
474 synonym of *Xanthomonas cynarae* Trébaol et al. 2000 and description of *X. cynarae* pv. *cynarae* and  
475 *X. cynarae* pv. *gardneri*. *Int. J. Syst. Evol. Microbiol.* 69:343–349.
- 476 Tinzaara, W., Karamura, E. B., Kubiriba, J., Ochola, D., Ocimati, W., Blomme, G., et al. 2016. The banana  
477 *Xanthomonas* wilt epidemic in east and central Africa: current research and development efforts. *Acta*

Studholme et al. Open Letter to the editor of *Phytopathology*

- 478 Hortic. :267–274.
- 479 Trébaol, G., Gardan, L., Manceau, C., Tanguy, J. L., Tirilly, Y., and Boury, S. 2000. Genomic and  
480 phenotypic characterization of *Xanthomonas cynarae* sp. nov., a new species that causes bacterial  
481 bract spot of artichoke (*Cynara scolymus* L.). Int. J. Syst. Evol. Microbiol. 50 Pt 4:1471–8.
- 482 Tushemereirwe, W., Kangire, A., Ssekiwoko, F., Offord, L. C., Crozier, J., Boa, E., et al. 2004. First report  
483 of *Xanthomonas campestris* pv. *musacearum* on banana in Uganda. Plant Pathol. 53:802–802.
- 484 Vauterin, L., Hoste, B., Kersters, K., and Swings, J. 1995. Reclassification of *Xanthomonas*. Int. J. Syst.  
485 Bacteriol. 45:472–489.
- 486 Vauterin, L., Rademaker, J., and Swings, J. 2000. Synopsis on the taxonomy of the genus *Xanthomonas*.  
487 Phytopathology. 90:677–82.
- 488 Vauterin, L., Swings, J., Kersters, K., Gillis, M., Mew, T. W., Schroth, M. N., et al. 1990. Towards an  
489 Improved Taxonomy of *Xanthomonas*. Int. J. Syst. Bacteriol. 40:312–316.
- 490 Vauterin, L., Yang, P., Alvarez, A., Takikawa, Y., Roth, D. A., Vidaver, A. K., et al. 1996. Identification of  
491 non-pathogenic *Xanthomonas* strains associated with plants. Syst. Appl. Microbiol. 19:96–105.
- 492 Vauterin, L., Yang, P., Hoste, B., Pot, B., Swings, J., and Kersters, K. 1992. Taxonomy of xanthomonads  
493 from cereals and grasses based on SDS-PAGE of proteins, fatty acid analysis and DNA hybridization. J.  
494 Gen. Microbiol. 138:1467–1477.
- 495 Vicente, J. G., Rothwell, S., Holub, E. B., and Studholme, D. J. 2017. Pathogenic, phenotypic and  
496 molecular characterisation of *Xanthomonas nasturtii* sp. nov. and *Xanthomonas floridensis* sp. nov.,  
497 new species of *Xanthomonas* associated with watercress production in Florida. Int. J. Syst. Evol.  
498 Microbiol. 67:3645–3654.
- 499 Wasukira, A., Coulter, M., Al-Sowayeh, N., Thwaites, R., Paszkiewicz, K., Kubiriba, J., et al. 2014.

Studholme et al. Open Letter to the editor of *Phytopathology*

500 Genome sequencing of *Xanthomonas vasicola* pathovar *vasculorum* reveals variation in plasmids and  
501 genes encoding lipopolysaccharide synthesis, type-IV pilus and type-III secretion effectors. *Pathog.*  
502 (Basel, Switzerland). 3:211–37.

503 Wasukira, A., Tayebwa, J., Thwaites, R., Paszkiewicz, K., Aritua, V., Kubiriba, J., et al. 2012. Genome-  
504 wide sequencing reveals two major sub-lineages in the genetically monomorphic pathogen  
505 *Xanthomonas campestris* pathovar *musacearum*. *Genes* (Basel). 3:361–377.

506 Wernham, C. C. 1948. The species value of pathogenicity in the genus *Xanthomonas*. *Am. Phytopathol.*  
507 *Soc.* 38:283–291.

508 Yang, P., Vauterin, L., Vancanneyt, M., Swings, J., and Kersters, K. 1993. Application of Fatty Acid  
509 Methyl Esters for the Taxonomic Analysis of the Genus *Xanthomonas*. *Syst. Appl. Microbiol.* 16:47–71.

510 Yirgou, D., and Bradbury, J. F. 1974. A note on wilt of banana caused by the enset wilt organism  
511 *Xanthomonas musacearum*. *East African Agric. For. J.* 40:111–114.

512 Yirgou, D., and Bradbury, J. F. 1968. Bacterial wilt of enset (*Ensete ventricosum*) incited by  
513 *Xanthomonas musacearum* sp. *Phytopathology.* 58:111–112.

514 Young, J. M., Bull, C. T., De Boer, S. H., Firrao, G., Saddler, G. E., Stead, D. E., et al. 2004. Names of Plant  
515 Pathogenic Bacteria , 1864 – 2004. *Rev. Plant Pathol.* 75:721–763.

516 Young, J. M., Dye, D. W., Bradbury, J. F., Panagopoulos, C. G., and Robbs, C. F. 1978. A proposed  
517 nomenclature and classification for plant pathogenic bacteria. *New Zeal. J. Agric. Res.* 21:153–177.

518

519

520

521 **Table 1. Classification of strains previously assigned to *X. campestris* pv. *vasculorum*.**

| Strain       | Vauterin (Vauterin et al. 1992, 1995) | Dookun (Dookun, Stead, and Autrey 2000) | Péros (Péros et al. 1994) | Current species assignation |
|--------------|---------------------------------------|-----------------------------------------|---------------------------|-----------------------------|
| NCPPB 186    | Type A                                | Group A                                 | n/a                       | <i>X. axonopodis</i>        |
| NCPPB 891    | Type A                                | Group A                                 | G1                        | <i>X. axonopodis</i>        |
| NCPPB 892    | n/a                                   | Group A                                 | n/a                       | <i>X. axonopodis</i>        |
| NCPPB 893    | n/a                                   | Group A                                 | n/a                       | <i>X. axonopodis</i>        |
| NCPPB 181    | Type A                                | Group B                                 | n/a                       | <i>X. axonopodis</i>        |
| NCPPB 796 PT | Type A                                | Group B                                 | n/a                       | <i>X. axonopodis</i>        |
| NCPPB 899    | n/a                                   | Group D                                 | n/a                       | <i>X. axonopodis</i>        |
| NCPPB 900    | n/a                                   | Group D                                 | n/a                       | <i>X. axonopodis</i>        |
| NCPPB 795    | Type B                                | Group C                                 | n/a                       | <i>X. vasicola</i>          |
| NCPPB 889    | Type B                                | Group C                                 | n/a                       | <i>X. vasicola</i>          |
| NCPPB 206    | n/a                                   | Group C                                 | n/a                       | <i>X. vasicola</i>          |
| NCPPB 702    | n/a                                   | Group C                                 | n/a                       | <i>X. vasicola</i>          |
| NCPPB 795    | n/a                                   | Group C                                 | n/a                       | <i>X. vasicola</i>          |
| NCPPB 889    | n/a                                   | Group C                                 | n/a                       | <i>X. vasicola</i>          |
| NCPPB 890    | n/a                                   | Group C                                 | n/a                       | <i>X. vasicola</i>          |
| NCPPB 895    | n/a                                   | Group C                                 | n/a                       | <i>X. vasicola</i>          |
| NCPPB 1326   | n/a                                   | Group C                                 | n/a                       | <i>X. vasicola</i>          |
| NCPPB 1381   | n/a                                   | Group C                                 | n/a                       | <i>X. vasicola</i>          |

522 <sup>z</sup>In this table, the superscript PT indicates the pathotype strain of *X. campestris* pv. *vasculorum*

523

Studholme et al. Open Letter to the editor of *Phytopathology*

524 **Table 2. Host ranges of the taxa discussed in this letter.**

| Current taxon                                                                                                                                             | Proposed taxon                                                              | Pathotype or Type strains                                 | Additional strains in NCPPB known to be part of the newly proposed taxon                                                                                                                                                           | Natural hosts                                                                                                                  | Hosts by inoculation                                                                                     |
|-----------------------------------------------------------------------------------------------------------------------------------------------------------|-----------------------------------------------------------------------------|-----------------------------------------------------------|------------------------------------------------------------------------------------------------------------------------------------------------------------------------------------------------------------------------------------|--------------------------------------------------------------------------------------------------------------------------------|----------------------------------------------------------------------------------------------------------|
| <i>X. campestris</i> pv. <i>arecae</i> (Rao and Mohan 1970) Dye 1978                                                                                      | <i>X. vasicola</i> pv. <i>arecae</i> pv. nov.                               | NCPPB 2649 = ICMP 5719 = LMG 533                          | None                                                                                                                                                                                                                               | <i>Areca catechu</i> (Bradbury 1986; Kumar 1993, 1983)                                                                         | <i>Cocos nucifera</i> , <i>Saccharum</i> sp. (Bradbury 1986)                                             |
| <i>X. campestris</i> pv. <i>musacearum</i> (Yirgou and Bradbury 1968) Dye 1978                                                                            | <i>X. vasicola</i> pv. <i>musacearum</i> pv. nov                            | NCPPB 2005 = ATCC 49084 = CFBP 7123 = ICMP 2870 = LMG 785 | NCPPB 2251; NCPPB 4378; NCPPB 4379; NCPPB 4380; NCPPB 4381; NCPPB 4383; NCPPB 4384; NCPPB 4386; NCPPB 4387; NCPPB 4388; NCPPB 4389; NCPPB 4390; NCPPB 4391; NCPPB 4392; NCPPB 4393; NCPPB 4394; NCPPB 4395; NCPPB 4433; NCPPB 4434 | <i>Ensete ventricosum</i> , <i>Musa</i> sp. (Bradbury 1986), <i>Tripsacum</i> sp. (Unpublished observation, E. Wicker),        | <i>Saccharum</i> sp., (Karamura et al. 2015), <i>Zea mays</i> (Karamura et al. 2015; Aritua et al. 2007) |
| [ <i>Xanthomonas vasicola</i> pv. <i>zeae</i> Coutinho and Wallis 1990]<br><br>[ <i>Xanthomonas vasicola</i> pv. <i>zeae</i> Qhobela et al 1990]          | <i>X. vasicola</i> pv. <i>vasculorum</i> pv. nov.                           | NCPPB 4614 = SAM119                                       | None                                                                                                                                                                                                                               | <i>Zea mays</i> (Coutinho and Wallis 1991)                                                                                     | <i>Sorghum</i> sp. (Lang et al. 2017)                                                                    |
| <i>X. vasicola</i> pv. <i>holcicola</i> (Elliott 1930) (Elliott 1930) Vauterin et al. 1995<br><br>(synonym of <i>X. campestris</i> pv. <i>holcicola</i> ) | <i>X. vasicola</i> pv. <i>holcicola</i> (Elliott 1930) Vauterin et al. 1995 | NCPPB 2417 = CFBP 2543 = ICMP 3103 = LMG 736              | NCPPB 989; NCPPB 1060; NCPPB 1241; NCPPB 2417; NCPPB 2930; NCPPB 3162                                                                                                                                                              | <i>Panicum miliaceum</i> , <i>Sorghum</i> spp., <i>Zea mays</i> (Bradbury 1986)                                                | <i>Echinochloa frumentacea</i> , <i>Pennisetum typhoides</i> , <i>Setaria italica</i> (Bradbury 1986)    |
| <i>X. campestris</i> pv. <i>vasculorum</i> type B = [ <i>X. vasicola</i> pv. <i>vasculorum</i> (Vauterin et al., 1995)]                                   | <i>X. vasicola</i> pv. <i>vasculorum</i> pv. nov.                           | NCPPB 4614 = SAM119                                       | NCPPB 206; NCPPB 702; NCPPB 795; NCPPB 889; NCPPB 890; NCPPB 895; NCPPB 1326; NCPPB 1381; NCPPB 4614                                                                                                                               | <i>Saccharum</i> spp., <i>Zea mays</i> , <i>Eucalyptus grandis</i> (Coutinho et al. 2015; Bradbury 1986; Vauterin et al. 1995) | <i>Saccharum</i> spp., <i>Zea mays</i> (Karamura et al. 2015)                                            |
| <i>Xanthomonas</i> sp.                                                                                                                                    | The taxonomic placement of these strains requires further study.            | Not applicable                                            | NCPPB 1394; NCPPB 1395; NCPPB 1396; NCPPB 902                                                                                                                                                                                      | <i>Tripsacum laxum</i> (Mulder 1961), <i>Vetiveria zizanioides</i> (Kumar 1993, 1983)                                          | Not known                                                                                                |

525

526



Studholme et al. Open Letter to the editor of *Phytopathology*

|                 |                                      |                                        |                                      |                                       |                                      |                                      |                          |                          |                                  |                                 |                          |                          |                                         |                         |                     |                                      |                                      |                                         |                      |                                       |                                |                            |                       |                                         |
|-----------------|--------------------------------------|----------------------------------------|--------------------------------------|---------------------------------------|--------------------------------------|--------------------------------------|--------------------------|--------------------------|----------------------------------|---------------------------------|--------------------------|--------------------------|-----------------------------------------|-------------------------|---------------------|--------------------------------------|--------------------------------------|-----------------------------------------|----------------------|---------------------------------------|--------------------------------|----------------------------|-----------------------|-----------------------------------------|
| 100.00          | 98.03                                | 98.33                                  | 98.61                                | 98.41                                 | 98.46                                | 98.62                                | 98.65                    | 98.67                    | 98.67                            | 98.63                           | 98.60                    | 87.06                    | 89.69                                   | 90.03                   | 90.19               | 90.11                                | 90.09                                | 90.55                                   | 90.56                | 90.69                                 | 90.63                          | 91.34                      | 91.24                 | X_sp_NCPPB_1394                         |
| 98.03           | 100.00                               | 98.43                                  | 98.60                                | 98.55                                 | 98.60                                | 98.73                                | 98.82                    | 98.84                    | 98.81                            | 98.80                           | 98.84                    | 87.35                    | 89.97                                   | 90.40                   | 90.50               | 90.43                                | 90.42                                | 90.91                                   | 90.89                | 90.96                                 | 90.95                          | 91.77                      | 91.64                 | X_vasicola_pv_holcicola_NCPPB_2417_T    |
| 98.33           | 98.43                                | 100.00                                 | 98.93                                | 98.81                                 | 98.84                                | 99.05                                | 99.04                    | 99.03                    | 99.03                            | 99.06                           | 99.07                    | 87.27                    | 89.98                                   | 90.43                   | 90.58               | 90.49                                | 90.49                                | 90.99                                   | 90.96                | 91.02                                 | 91.01                          | 91.79                      | 91.66                 | X_campestris_pv_muscaeum_NCPPB_2005_PT  |
| 98.61           | 98.60                                | 98.93                                  | 100.00                               | 99.13                                 | 99.19                                | 99.39                                | 99.40                    | 99.40                    | 99.39                            | 99.38                           | 99.36                    | 87.22                    | 89.87                                   | 90.27                   | 90.40               | 90.34                                | 90.33                                | 90.74                                   | 90.74                | 90.89                                 | 90.85                          | 91.65                      | 91.55                 | X_campestris_pv_arecae_NCPPB_2649_PT    |
| 98.41           | 98.55                                | 98.81                                  | 99.13                                | 100.00                                | 99.50                                | 99.31                                | 99.43                    | 99.41                    | 99.41                            | 99.47                           | 99.42                    | 87.22                    | 89.87                                   | 90.31                   | 90.44               | 90.36                                | 90.39                                | 90.76                                   | 90.73                | 90.89                                 | 90.84                          | 91.69                      | 91.56                 | X_campestris_pv_vasculorum_NCPPB_1326   |
| 98.46           | 98.60                                | 98.84                                  | 99.19                                | 99.50                                 | 100.00                               | 99.38                                | 99.48                    | 99.47                    | 99.47                            | 99.50                           | 99.47                    | 87.22                    | 89.91                                   | 90.34                   | 90.45               | 90.37                                | 90.40                                | 90.76                                   | 90.75                | 90.91                                 | 90.86                          | 91.70                      | 91.58                 | X_campestris_pv_vasculorum_NCPPB_702    |
| 98.62           | 98.73                                | 99.05                                  | 99.39                                | 99.31                                 | 99.38                                | 100.00                               | 99.60                    | 99.61                    | 99.61                            | 99.60                           | 99.58                    | 87.34                    | 89.97                                   | 90.38                   | 90.51               | 90.43                                | 90.42                                | 90.85                                   | 90.81                | 90.96                                 | 90.94                          | 91.74                      | 91.65                 | X_campestris_pv_vasculorum_NCPPB_206    |
| 98.65           | 98.82                                | 99.04                                  | 99.40                                | 99.43                                 | 99.48                                | 99.60                                | 100.00                   | 99.99                    | 99.97                            | 99.97                           | 99.84                    | 87.36                    | 90.02                                   | 90.39                   | 90.53               | 90.47                                | 90.45                                | 90.85                                   | 90.83                | 91.00                                 | 90.94                          | 91.85                      | 91.72                 | X_campestris_pv_zeae_XGP                |
| 98.67           | 98.84                                | 99.03                                  | 99.40                                | 99.41                                 | 99.47                                | 99.61                                | 99.96                    | 100.00                   | 99.98                            | 99.97                           | 99.84                    | 87.31                    | 89.95                                   | 90.37                   | 90.50               | 90.44                                | 90.43                                | 90.84                                   | 90.82                | 90.96                                 | 90.92                          | 91.77                      | 91.65                 | X_campestris_pv_vasculorum_NE744        |
| 98.67           | 98.81                                | 99.03                                  | 99.39                                | 99.41                                 | 99.47                                | 99.61                                | 99.97                    | 99.98                    | 100.00                           | 99.98                           | 99.85                    | 87.32                    | 89.95                                   | 90.37                   | 90.49               | 90.43                                | 90.42                                | 90.84                                   | 90.82                | 90.96                                 | 90.92                          | 91.77                      | 91.66                 | X_campestris_pv_zeae_NCPPB_4614         |
| 98.63           | 98.80                                | 99.06                                  | 99.38                                | 99.47                                 | 99.50                                | 99.60                                | 99.97                    | 99.97                    | 99.98                            | 100.00                          | 99.89                    | 87.46                    | 90.04                                   | 90.42                   | 90.56               | 90.49                                | 90.47                                | 90.85                                   | 90.83                | 90.99                                 | 90.96                          | 91.86                      | 91.74                 | X_campestris_pv_zeae_X45                |
| 98.60           | 98.84                                | 99.07                                  | 99.36                                | 99.42                                 | 99.47                                | 99.58                                | 99.94                    | 99.94                    | 99.95                            | 99.95                           | 100.00                   | 87.42                    | 90.04                                   | 90.44                   | 90.54               | 90.47                                | 90.46                                | 90.83                                   | 90.82                | 90.99                                 | 90.95                          | 91.86                      | 91.75                 | X_campestris_pv_zeae_XZ9                |
| 87.06           | 87.35                                | 87.27                                  | 87.22                                | 87.22                                 | 87.22                                | 87.34                                | 87.36                    | 87.31                    | 87.32                            | 87.46                           | 87.42                    | 100.00                   | 87.79                                   | 87.46                   | 87.44               | 87.35                                | 87.35                                | 87.53                                   | 87.55                | 87.59                                 | 87.42                          | 87.28                      | 87.43                 | X_campestris_pv_campestris_ATCC_33913_T |
| 89.59           | 89.97                                | 89.98                                  | 89.87                                | 89.87                                 | 89.91                                | 89.97                                | 90.02                    | 89.95                    | 89.95                            | 90.04                           | 90.04                    | 87.79                    | 100.00                                  | 89.97                   | 89.93               | 89.86                                | 89.86                                | 90.02                                   | 90.02                | 90.19                                 | 90.03                          | 89.88                      | 90.02                 | X_nasturtii_WHRI_8853_T                 |
| 90.03           | 90.40                                | 90.43                                  | 90.27                                | 90.31                                 | 90.34                                | 90.38                                | 90.39                    | 90.37                    | 90.37                            | 90.42                           | 90.44                    | 87.46                    | 89.97                                   | 100.00                  | 90.36               | 90.32                                | 90.31                                | 90.32                                   | 90.30                | 90.45                                 | 90.38                          | 90.35                      | 90.53                 | X_bromi_CFBP_1976_T                     |
| 90.19           | 90.50                                | 90.58                                  | 90.40                                | 90.44                                 | 90.45                                | 90.51                                | 90.53                    | 90.50                    | 90.49                            | 90.56                           | 90.54                    | 87.44                    | 89.93                                   | 90.36                   | 100.00              | 98.12                                | 98.08                                | 93.41                                   | 93.40                | 93.45                                 | 93.44                          | 90.52                      | 90.47                 | X_axonopodis_pv_axonopodis_LMG_982_T    |
| 90.11           | 90.43                                | 90.49                                  | 90.34                                | 90.36                                 | 90.37                                | 90.43                                | 90.47                    | 90.44                    | 90.43                            | 90.49                           | 90.47                    | 87.35                    | 89.86                                   | 90.32                   | 98.12               | 100.00                               | 99.84                                | 93.25                                   | 93.24                | 93.33                                 | 93.25                          | 90.40                      | 90.40                 | X_axonopodis_pv_vasculorum_NCPPB_900    |
| 90.09           | 90.42                                | 90.49                                  | 90.33                                | 90.39                                 | 90.40                                | 90.42                                | 90.45                    | 90.43                    | 90.42                            | 90.47                           | 90.46                    | 87.35                    | 89.86                                   | 90.31                   | 98.08               | 99.84                                | 100.00                               | 93.25                                   | 93.23                | 93.33                                 | 93.25                          | 90.40                      | 90.40                 | X_axonopodis_pv_vasculorum_CFBP_5823_PT |
| 90.55           | 90.91                                | 90.99                                  | 90.74                                | 90.76                                 | 90.76                                | 90.85                                | 90.85                    | 90.84                    | 90.84                            | 90.85                           | 90.83                    | 87.53                    | 90.02                                   | 90.32                   | 93.41               | 93.25                                | 93.25                                | 100.00                                  | 98.76                | 94.19                                 | 94.30                          | 90.86                      | 90.72                 | X_perforans_91-118_T                    |
| 90.56           | 90.89                                | 90.96                                  | 90.74                                | 90.73                                 | 90.75                                | 90.81                                | 90.83                    | 90.82                    | 90.82                            | 90.83                           | 90.82                    | 87.55                    | 90.02                                   | 90.30                   | 93.40               | 93.24                                | 93.23                                | 98.76                                   | 100.00               | 94.21                                 | 94.30                          | 90.87                      | 90.72                 | X_alfalfae_subsp_alfalfae_CFBP_3836_T   |
| 90.69           | 90.96                                | 91.02                                  | 90.89                                | 90.89                                 | 91.01                                | 90.96                                | 91.00                    | 90.96                    | 90.96                            | 90.99                           | 90.99                    | 87.59                    | 90.19                                   | 90.45                   | 93.45               | 93.33                                | 93.33                                | 94.19                                   | 94.21                | 100.00                                | 96.39                          | 90.89                      | 90.81                 | X_fuscans_pv_fuscans_LMG_826_T          |
| 90.63           | 90.95                                | 91.01                                  | 90.85                                | 90.84                                 | 90.86                                | 90.94                                | 90.94                    | 90.92                    | 90.92                            | 90.96                           | 90.95                    | 87.42                    | 90.03                                   | 90.38                   | 93.44               | 93.25                                | 93.25                                | 94.30                                   | 94.30                | 96.39                                 | 100.00                         | 90.82                      | 90.75                 | X_citri_pv_citri_LMG9322_T              |
| 91.34           | 91.77                                | 91.79                                  | 91.65                                | 91.69                                 | 91.70                                | 91.74                                | 91.85                    | 91.77                    | 91.77                            | 91.86                           | 91.86                    | 87.28                    | 89.88                                   | 90.35                   | 90.52               | 90.40                                | 90.40                                | 90.86                                   | 90.87                | 90.89                                 | 90.82                          | 100.00                     | 91.71                 | X_oryzae_ATCC_35933_T                   |
| 91.24           | 91.64                                | 91.66                                  | 91.56                                | 91.56                                 | 91.58                                | 91.65                                | 91.72                    | 91.65                    | 91.66                            | 91.74                           | 91.75                    | 87.42                    | 90.02                                   | 90.53                   | 90.47               | 90.40                                | 90.40                                | 90.72                                   | 90.72                | 90.81                                 | 90.75                          | 91.71                      | 100.00                | X_prunicola_CFBP_8353_T                 |
| X_sp_NCPPB_1394 | X_vasicola_pv_holcicola_NCPPB_2417_T | X_campestris_pv_muscaeum_NCPPB_2005_PT | X_campestris_pv_arecae_NCPPB_2649_PT | X_campestris_pv_vasculorum_NCPPB_1326 | X_campestris_pv_vasculorum_NCPPB_702 | X_campestris_pv_vasculorum_NCPPB_206 | X_campestris_pv_zeae_XGP | X_campestris_pv_zeae_X45 | X_campestris_pv_vasculorum_NE744 | X_campestris_pv_zeae_NCPPB_4614 | X_campestris_pv_zeae_X45 | X_campestris_pv_zeae_XZ9 | X_campestris_pv_campestris_ATCC_33913_T | X_nasturtii_WHRI_8853_T | X_bromi_CFBP_1976_T | X_axonopodis_pv_axonopodis_LMG_982_T | X_axonopodis_pv_vasculorum_NCPPB_900 | X_axonopodis_pv_vasculorum_CFBP_5823_PT | X_perforans_91-118_T | X_alfalfae_subsp_alfalfae_CFBP_3836_T | X_fuscans_pv_fuscans_LMG_826_T | X_citri_pv_citri_LMG9322_T | X_oryzae_ATCC_35933_T | X_prunicola_CFBP_8353_T                 |

527

528 **Figure 1. Average nucleotide identity (ANI) with type strains of *Xanthomonas* species.** Genome

529 sequence assemblies were obtained from GenBank and aligned against each other and ANI was

530 calculated using the *dnadiff* function in MUMmer version 4 (Marçais et al. 2018). Accession numbers

531 of the genome assemblies: GCA\_000774005.1, GCA\_000772705.1, GCA\_000277875.1,

532 GCA\_000770355.1, GCA\_000277995.1, GCA\_000159795.2, GCA\_000278035.1, GCA\_003111865.1,

533 GCA\_002191965.1, GCA\_002191955.1, GCA\_003111905.1, GCA\_003111825.1, GCA\_000007145.1,

534 GCA\_001660815.1, GCA\_002939755.1, GCA\_001401595.1, GCA\_002939725.1, GCA\_000724905.2,

535 GCA\_000192045.3, GCA\_000488955.1, GCA\_001401605.1, GCA\_002018575.1, GCA\_000482445.1

536 and GCA\_002846205.1 (Studholme et al. 2010; Wasukira et al. 2014, 2012; Lang et al. 2017; Sanko et

537 al. 2018; da Silva et al. 2002; Vicente et al. 2017; Harrison and Studholme 2014; Potnis et al. 2011;

538 Jacques et al. 2013).

539

540

541

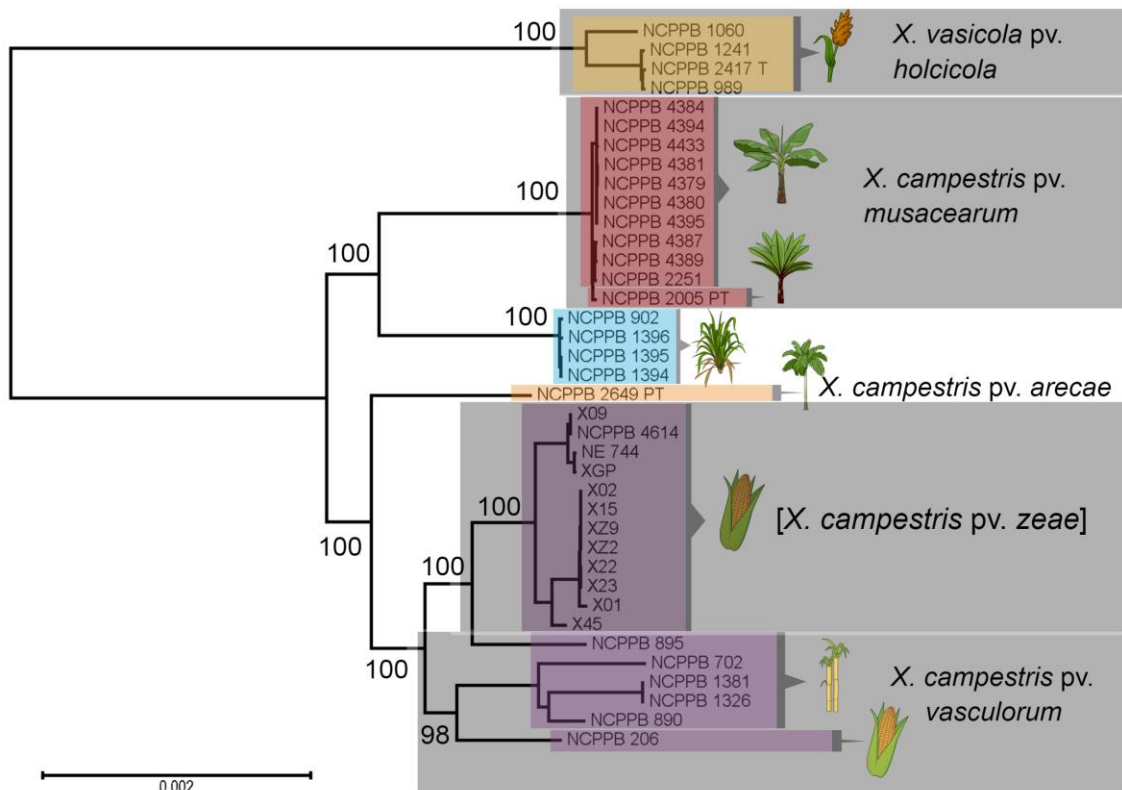

542

543 **Figure 2. Maximum-likelihood phylogenetic tree based on genomic sequencing reads.** The maximum  
544 likelihood tree was generated using RealPhy (Bertels et al. 2014) and RaxML (Stamatakis, Ludwig, and  
545 Meier 2005). Bootstrap values are expressed as percentages of 500 trials. Type and pathotype strains  
546 are indicated by 'P' and 'PT' respectively. Whole-genome shotgun sequence reads were obtained from  
547 the Sequence Read Archive (Leinonen, Sugawara, and Shumway 2011) via BioProjects PRJNA73853,  
548 PRJNA163305, PRJNA163307, PRJNA31213, PRJNA374510, PRJNA374557, PRJNA439013,  
549 PRJNA439327, PRJNA439328, PRJNA439329 and PRJNA449864 (Lang et al. 2017; Wasukira et al. 2014,  
550 2012; Sanko et al. 2018).

551

|                 |                                        |                                            |                                        |                                         |                                        |                                        |                            |                            |                            |                            |                                    |                                   |                                         |                                        |                            |                          |                      |                                        |                                        |                                           |                                         |                                  |                              |                                            |                          |
|-----------------|----------------------------------------|--------------------------------------------|----------------------------------------|-----------------------------------------|----------------------------------------|----------------------------------------|----------------------------|----------------------------|----------------------------|----------------------------|------------------------------------|-----------------------------------|-----------------------------------------|----------------------------------------|----------------------------|--------------------------|----------------------|----------------------------------------|----------------------------------------|-------------------------------------------|-----------------------------------------|----------------------------------|------------------------------|--------------------------------------------|--------------------------|
| 98.03           | 98.33                                  | 98.61                                      | 98.41                                  | 98.46                                   | 98.62                                  | 98.67                                  | 98.67                      | 98.63                      | 98.60                      | 87.06                      | 89.59                              | 90.03                             | 90.19                                   | 90.11                                  | 90.09                      | 90.55                    | 90.56                | 90.69                                  | 90.63                                  | 91.34                                     | 91.24                                   | X. sp. NCPPB 1394                |                              |                                            |                          |
| 98.03           | 100.00                                 | 98.43                                      | 98.60                                  | 98.55                                   | 98.80                                  | 98.73                                  | 98.82                      | 98.84                      | 98.81                      | 98.90                      | 98.84                              | 87.35                             | 89.97                                   | 90.40                                  | 90.50                      | 90.43                    | 90.42                | 90.91                                  | 90.89                                  | 90.96                                     | 90.95                                   | 91.77                            | 91.64                        | X. vasicola pv. holcicola NCPPB 2417 T     |                          |
| 98.33           | 98.43                                  | 100.00                                     | 98.93                                  | 98.81                                   | 98.84                                  | 98.05                                  | 99.04                      | 99.03                      | 99.03                      | 99.06                      | 99.07                              | 87.27                             | 89.98                                   | 90.43                                  | 90.58                      | 90.49                    | 90.49                | 90.99                                  | 90.96                                  | 91.02                                     | 91.01                                   | 91.79                            | 91.66                        | X. campestris pv. musacearum NCPPB 2005 PT |                          |
| 98.61           | 98.80                                  | 98.93                                      | 100.00                                 | 99.13                                   | 99.19                                  | 99.39                                  | 99.40                      | 99.40                      | 99.39                      | 99.38                      | 99.38                              | 87.22                             | 89.87                                   | 90.27                                  | 90.40                      | 90.34                    | 90.33                | 90.74                                  | 90.74                                  | 90.89                                     | 90.85                                   | 91.65                            | 91.55                        | X. campestris pv. arecae NCPPB 2649 PT     |                          |
| 98.41           | 98.35                                  | 98.81                                      | 99.13                                  | 100.00                                  | 99.50                                  | 99.31                                  | 99.43                      | 99.41                      | 99.41                      | 99.47                      | 99.42                              | 87.22                             | 89.87                                   | 90.31                                  | 90.44                      | 90.36                    | 90.39                | 90.76                                  | 90.73                                  | 90.89                                     | 90.84                                   | 91.69                            | 91.56                        | X. campestris pv. vasculorum NCPPB 1326    |                          |
| 98.46           | 98.60                                  | 98.84                                      | 99.19                                  | 99.50                                   | 100.00                                 | 99.38                                  | 99.48                      | 99.47                      | 99.47                      | 99.50                      | 99.47                              | 87.22                             | 89.91                                   | 90.34                                  | 90.45                      | 90.37                    | 90.40                | 90.76                                  | 90.75                                  | 90.91                                     | 90.86                                   | 91.70                            | 91.58                        | X. campestris pv. vasculorum NCPPB 702     |                          |
| 98.62           | 98.73                                  | 99.05                                      | 99.39                                  | 99.31                                   | 99.38                                  | 100.00                                 | 99.60                      | 99.61                      | 99.61                      | 99.60                      | 99.58                              | 87.34                             | 89.97                                   | 90.38                                  | 90.51                      | 90.43                    | 90.42                | 90.85                                  | 90.81                                  | 90.96                                     | 90.94                                   | 91.74                            | 91.65                        | X. campestris pv. vasculorum NCPPB 206     |                          |
| 98.65           | 98.82                                  | 99.04                                      | 99.40                                  | 99.43                                   | 99.48                                  | 99.60                                  | 100.00                     | 99.99                      | 99.97                      | 99.97                      | 99.84                              | 87.36                             | 90.02                                   | 90.39                                  | 90.53                      | 90.47                    | 90.45                | 90.85                                  | 90.83                                  | 91.00                                     | 90.94                                   | 91.85                            | 91.72                        | X. campestris pv. zeae XGP                 |                          |
| 98.67           | 98.84                                  | 99.03                                      | 99.40                                  | 99.41                                   | 99.47                                  | 99.61                                  | 99.99                      | 100.00                     | 99.98                      | 99.97                      | 99.84                              | 87.31                             | 89.95                                   | 90.37                                  | 90.50                      | 90.44                    | 90.43                | 90.84                                  | 90.82                                  | 90.96                                     | 90.92                                   | 91.77                            | 91.65                        | X. campestris pv. vasculorum NE744         |                          |
| 98.67           | 98.81                                  | 99.03                                      | 99.38                                  | 99.41                                   | 99.47                                  | 99.61                                  | 99.97                      | 99.98                      | 100.00                     | 99.98                      | 99.89                              | 87.32                             | 89.95                                   | 90.37                                  | 90.49                      | 90.43                    | 90.42                | 90.84                                  | 90.82                                  | 90.96                                     | 90.92                                   | 91.77                            | 91.66                        | X. campestris pv. zeae NCPPB 4614          |                          |
| 98.63           | 98.80                                  | 99.06                                      | 99.38                                  | 99.47                                   | 99.50                                  | 99.60                                  | 99.87                      | 99.87                      | 99.88                      | 100.00                     | 99.89                              | 87.46                             | 90.04                                   | 90.42                                  | 90.56                      | 90.49                    | 90.47                | 90.85                                  | 90.83                                  | 90.99                                     | 90.96                                   | 91.86                            | 91.74                        | X. campestris pv. zeae X45                 |                          |
| 98.60           | 98.84                                  | 99.07                                      | 99.36                                  | 99.42                                   | 99.47                                  | 99.58                                  | 99.94                      | 99.94                      | 99.95                      | 99.99                      | 100.00                             | 87.42                             | 90.04                                   | 90.44                                  | 90.54                      | 90.47                    | 90.46                | 90.83                                  | 90.82                                  | 90.99                                     | 90.95                                   | 91.86                            | 91.75                        | X. campestris pv. zeae XZ9                 |                          |
| 87.06           | 87.35                                  | 87.27                                      | 87.22                                  | 87.22                                   | 87.22                                  | 87.34                                  | 87.36                      | 87.31                      | 87.32                      | 87.46                      | 87.42                              | 100.00                            | 87.79                                   | 87.46                                  | 87.44                      | 87.35                    | 87.35                | 87.53                                  | 87.55                                  | 87.59                                     | 87.42                                   | 87.28                            | 87.43                        | X. campestris pv. campestris ATCC 33913 T  |                          |
| 89.59           | 89.97                                  | 89.96                                      | 89.87                                  | 89.87                                   | 89.91                                  | 89.97                                  | 90.02                      | 89.95                      | 89.95                      | 90.04                      | 90.04                              | 87.79                             | 100.00                                  | 89.97                                  | 89.93                      | 89.86                    | 89.86                | 90.02                                  | 90.02                                  | 90.19                                     | 90.03                                   | 89.88                            | 90.02                        | X. nasturtii WHRI 8853 T                   |                          |
| 90.03           | 90.40                                  | 90.43                                      | 90.27                                  | 90.31                                   | 90.34                                  | 90.38                                  | 90.39                      | 90.37                      | 90.37                      | 90.42                      | 90.44                              | 87.46                             | 89.97                                   | 100.00                                 | 90.36                      | 90.32                    | 90.31                | 90.32                                  | 90.30                                  | 90.45                                     | 90.38                                   | 90.35                            | 90.53                        | X. bromi CFBP 1976 T                       |                          |
| 90.19           | 90.50                                  | 90.58                                      | 90.40                                  | 90.44                                   | 90.45                                  | 90.51                                  | 90.53                      | 90.50                      | 90.49                      | 90.56                      | 90.54                              | 87.44                             | 89.93                                   | 90.36                                  | 100.00                     | 98.12                    | 98.08                | 93.41                                  | 93.40                                  | 93.45                                     | 93.44                                   | 90.52                            | 90.47                        | X. axonopodis pv. axonopodis LMG 982 T     |                          |
| 90.11           | 90.43                                  | 90.49                                      | 90.34                                  | 90.36                                   | 90.37                                  | 90.43                                  | 90.47                      | 90.44                      | 90.43                      | 90.49                      | 90.47                              | 87.35                             | 89.96                                   | 90.32                                  | 98.12                      | 100.00                   | 98.84                | 93.25                                  | 93.24                                  | 93.33                                     | 93.25                                   | 90.40                            | 90.40                        | X. axonopodis pv. vasculorum NCPPB 900     |                          |
| 90.09           | 90.42                                  | 90.49                                      | 90.33                                  | 90.39                                   | 90.40                                  | 90.42                                  | 90.45                      | 90.43                      | 90.42                      | 90.47                      | 90.46                              | 87.35                             | 89.96                                   | 90.31                                  | 98.08                      | 99.84                    | 100.00               | 93.25                                  | 93.23                                  | 93.33                                     | 93.25                                   | 90.40                            | 90.40                        | X. axonopodis pv. vasculorum CFBP 5823 PT  |                          |
| 90.55           | 90.91                                  | 90.99                                      | 90.74                                  | 90.76                                   | 90.76                                  | 90.85                                  | 90.85                      | 90.84                      | 90.84                      | 90.85                      | 90.83                              | 87.53                             | 90.02                                   | 90.32                                  | 93.41                      | 93.25                    | 93.25                | 100.00                                 | 98.76                                  | 94.19                                     | 94.30                                   | 90.86                            | 90.72                        | X. perforans 91-118 T                      |                          |
| 90.56           | 90.89                                  | 90.96                                      | 90.74                                  | 90.73                                   | 90.75                                  | 90.81                                  | 90.83                      | 90.82                      | 90.82                      | 90.83                      | 90.82                              | 87.55                             | 90.02                                   | 90.30                                  | 93.40                      | 93.24                    | 93.23                | 98.76                                  | 100.00                                 | 94.21                                     | 94.30                                   | 90.87                            | 90.72                        | X. alfalfae subsp. alfalfae CFBP 3836 T    |                          |
| 90.69           | 90.96                                  | 91.02                                      | 90.89                                  | 90.89                                   | 90.91                                  | 90.96                                  | 91.00                      | 90.96                      | 90.96                      | 90.99                      | 90.99                              | 87.59                             | 90.19                                   | 90.45                                  | 93.45                      | 93.33                    | 93.33                | 94.19                                  | 94.21                                  | 100.00                                    | 96.39                                   | 90.89                            | 90.81                        | X. fuscans pv. fuscans LMG 826 T           |                          |
| 90.63           | 90.95                                  | 91.01                                      | 90.85                                  | 90.84                                   | 90.86                                  | 90.94                                  | 90.94                      | 90.92                      | 90.92                      | 90.96                      | 90.95                              | 87.42                             | 90.03                                   | 90.38                                  | 93.44                      | 93.25                    | 93.25                | 94.30                                  | 94.30                                  | 96.39                                     | 100.00                                  | 90.82                            | 90.75                        | X. citri pv. citri LMG9322 T               |                          |
| 91.34           | 91.77                                  | 91.79                                      | 91.65                                  | 91.69                                   | 91.70                                  | 91.74                                  | 91.85                      | 91.77                      | 91.77                      | 91.86                      | 91.86                              | 87.28                             | 89.88                                   | 90.35                                  | 90.52                      | 90.40                    | 90.40                | 90.86                                  | 90.87                                  | 90.89                                     | 90.82                                   | 100.00                           | 91.71                        | X. oryzae ATCC 35933 T                     |                          |
| 91.24           | 91.64                                  | 91.66                                      | 91.55                                  | 91.56                                   | 91.58                                  | 91.65                                  | 91.72                      | 91.65                      | 91.66                      | 91.74                      | 91.75                              | 87.43                             | 90.02                                   | 90.53                                  | 90.47                      | 90.40                    | 90.40                | 90.72                                  | 90.72                                  | 90.81                                     | 90.75                                   | 91.71                            | 100.00                       | X. prunicola CFBP 8353 T                   |                          |
| X_sp_NCPPB_1394 | X. vasicola pv. holcicola NCPPB 2417 T | X. campestris pv. musacearum NCPPB 2005 PT | X. campestris pv. arecae NCPPB 2649 PT | X. campestris pv. vasculorum NCPPB 1326 | X. campestris pv. vasculorum NCPPB 702 | X. campestris pv. vasculorum NCPPB 206 | X. campestris pv. zeae XGP | X. campestris pv. zeae X45 | X. campestris pv. zeae XZ9 | X. campestris pv. zeae X45 | X. campestris pv. vasculorum NE744 | X. campestris pv. zeae NCPPB 4614 | X. campestris pv. vasculorum NCPPB 1326 | X. campestris pv. vasculorum NCPPB 206 | X. campestris pv. zeae XGP | X. nasturtii WHRI 8853 T | X. bromi CFBP 1976 T | X. axonopodis pv. axonopodis LMG 982 T | X. axonopodis pv. vasculorum NCPPB 900 | X. axonopodis pv. vasculorum CFBP 5823 PT | X. alfalfae subsp. alfalfae CFBP 3836 T | X. fuscans pv. fuscans LMG 826 T | X. citri pv. citri LMG9322 T | X. oryzae ATCC 35933 T                     | X. prunicola CFBP 8353 T |

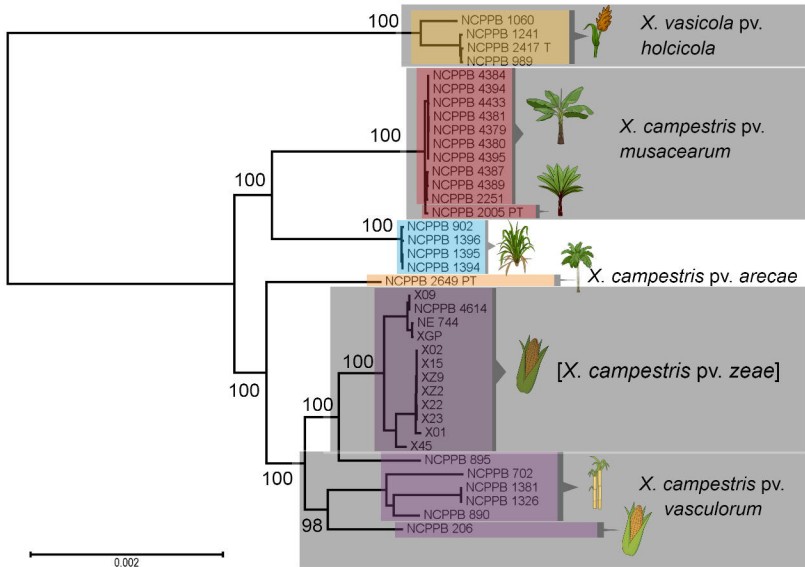

Source: http://biorxiv.org/content/10.1101/571166v2.full.pdf
